# Supplementary material for: Beta Palmitate Improves Bone Length and Quality during Catch-Up Growth in Young Rats
Source: MDPI journal article supplement (doi:10.3390/nu9070764), 2017-07-18
Supplement: s1 [file s1]

**Table S1.** Macronutrient, vitamin, and mineral content of the experimental diets.

|                          | 2018SC (Normal Chow) | TD.140108 (Control Diet) | TD.140107<br>(Infat Oil Diet) |
|--------------------------|----------------------|--------------------------|-------------------------------|
| Energy (Kcal/g)          | 3.1                  | 3.2                      | 3.2                           |
| Carbohydrate (g/Kg)      | 442                  | 486                      | 486                           |
| Protein (g/Kg)           | 186 <sup>a</sup>     | 205.0                    | 205                           |
| Fat (g/Kg)               | 60                   | 56                       | 56                            |
| Fiber (cellulose) (g/Kg) | 147                  | 150                      | 150                           |
|                          | Minerals             |                          |                               |
| Calcium, g/kg            | 10                   | 10                       | 10                            |
| Phosphorus, g/kg         | 7 <sup>b</sup>       | 4                        | 4                             |
| Sodium, g/kg             | 2                    | 2                        | 2                             |
| Potassium, g/kg          | 6                    | 7                        | 7                             |
| Chloride, g/kg           | 4                    | 3.1                      | 3.1                           |
| Magnesium, g/kg          | 2                    | 1                        | 1                             |
| Zinc, mg/kg              | 70                   | 70                       | 70                            |
| Manganese, mg/kg         | 100                  | 20                       | 20                            |
| Copper, mg/kg            | 15                   | 12                       | 12                            |
| Iodine, mg/kg            | 6                    | 0.4                      | 0.4                           |
| Iron, mg/kg              | 200                  | 71                       | 71                            |
| Selenium, mg/kg          | 0.23                 | 0.29                     | 0.29                          |
|                          | Vitamins             |                          |                               |
| A (IU/g)                 | 15                   | 15                       | 15                            |
| B1 (thiamin), mg/kg      | 17                   | 17                       | 17                            |
| B2 (riboflavin), mg/kg   | 15                   | 22                       | 22                            |
| B3 (niacin), mg/kg       | 70                   | 99                       | 99                            |
| B6, mg/kg                | 18                   | 18                       | 18                            |
| B12, mg/kg               | 0.08                 | 0.03                     | 0.03                          |
| C <sup>c</sup> , mg/kg   | -                    | 1                        | 1                             |
| D3, IU/g                 | 1.5                  | 1.5                      | 1.5                           |
| E, mg/kg                 | 110                  | 100                      | 100                           |
| Choline, mg/kg           | 1200                 | 1200                     | 1200                          |
| Biotin, mg/kg            | 0.4                  | 0.4                      | 0.4                           |
| Folic acid, mg/kg        | 4                    | 2                        | 2                             |
| K3, mg/kg                | 50                   | 50                       | 50                            |
| Pantothenic acid mg/kg   | 33                   | 60                       | 60                            |
|                          | Fat                  |                          |                               |
| C14                      | ND                   | 0.3                      | 0.2                           |
| C16:0                    | 13.0                 | 14.4                     | 13.9                          |
| C16:0 sn-2 ratio         | 13.5                 | 12.9                     | 53.0                          |
| C16:1                    | ND.                  | 0.2                      | 0.1                           |
| C18                      | 3.0                  | 3.1                      | 3.4                           |
| C18:1 n9                 | 20.4                 | 32.1                     | 36.7                          |
| C18:1 n11                | 1.2                  | 1.1                      | 1.0                           |
| C18:2                    | 54.9                 | 37.9                     | 34.2                          |
| C18:3                    | 5.7                  | 1.6                      | 1.3                           |
| Total saturated          | 16.00                | 17.79                    | 17.67                         |
| Total polyunsaturated    | 60.6                 | 39.44                    | 35.48                         |

<sup>a</sup> 207 g of casein translates to 180 g (the remaining 13% is primarily water, approximately 0.7% phosphorus and 1% fat). <sup>b</sup> Phosphorus: in 2018sc; a portion of this phosphorus is unavailable because it is bound to phytate. That is not the case in the purified diets. <sup>c</sup> The vitamin premix used in the purified diets contains vitamin C; therefore, the value is shown for the purified diets but not 2018sc. There is no requirement for vitamin C supplementation as rodents can synthesize it. Palmitic acid accounts for about 16% of total fat; Infat Oil has about 50% of total palmitic acid at the *sn*-2 position.

**Table S2.** Growth parameters for the preliminary experiment.

| <b>Diet</b>        | <b>Control <i>sn-1,3</i>,<br/>Diet</b> | <b>Infat Oil (BPA)</b> |
|--------------------|----------------------------------------|------------------------|
| Weight (g)         | 256.3 ± 12.3                           | 258.9 ± 19.1           |
| Weight gain (g)    | 201.9 ± 11.2                           | 203.6 ± 15.4           |
| Liver weight (g)   | 13.6 ± 0.93                            | 14.2 ± 1.57            |
| Heart weight (g)   | 1.4 ± 0.2                              | 1.4 ± 0.2              |
| Lungs weight (g)   | 2.34 ± 0.5                             | 2.35 ± 0.6             |
| Kidneys weight (g) | 3 ± 0.3                                | 3.2 ± 0.3              |
| Humeri length (mm) | 24.33 ± 0.36                           | 24.26 ± 0.74           |
| EGP height (mm)    | 0.37 ± 0.03                            | 0.39 ± 0.04            |

There were no between-group differences in any of the parameters.

**Table S3.** Serum chemical analysis from the preliminary experiment.

| <b>Parameters</b>              | <b>Control <i>sn-1,3</i>,<br/>Diet</b> | <b>Infat Oil (Beta<br/>Palmitate) Diet</b> | <b>Reference Values<br/>Male SD Rats</b> |
|--------------------------------|----------------------------------------|--------------------------------------------|------------------------------------------|
| Creatinine (mg/dl)             | 0.298 ± 0.02                           | 0.29 ± 0.05                                | 0.27–0.65                                |
| Urea (mg/dl)                   | 53.24 ± 5.71                           | 51.16 ± 6.33                               | 29.3–59.2                                |
| Total protein (g/dl)           | 6.322 ± 0.19                           | 6.385 ± 0.16                               | 5.92–7.46                                |
| Cholesterol (mg/dl)            | 120.2 ± 18.27                          | 115.72 ± 11.14                             | 79–137                                   |
| Globulin (g/dl)                | 1.962 ± 0.13                           | 1.97 ± 0.15                                | 1.69–3.01                                |
| Triglycerides (mg/dl)          | 172.3 ± 37.68                          | 194.36 ± 59.05                             | 21–86                                    |
| Albumin (g/dl)                 | 4.36 ± 0.14                            | 4.40 ± 0.16                                | 3.93–4.73                                |
| SGOT (IU/L)                    | 94.5 ± 12.55                           | 114.45 ± 35.17                             | 57–210                                   |
| SGPT (IU/L)                    | 39.7 ± 3.53                            | 38.54 ± 7.13                               | 30–106                                   |
| Alkaline phosphatase<br>(IU/L) | 289.1 ± 39.05                          | 279.18 ± 34.51                             | 81–197                                   |
| Calcium (mg/dl)                | 14.35 ± 0.5                            | 14.21 ± 0.22                               | 9.92–12.28                               |
| Phosphorus (mg/dl)             | 8.44 ± 0.66                            | 8.27 ± 0.61                                | 8.1–12.1                                 |
| Na (mmol/L)                    | 147.8 ± 1.03                           | 148.45 ± 2.16                              | 142–147                                  |
| K (mmol/L)                     | 6.02 ± 0.57                            | 6.46 ± 0.92                                | 5.3–7.3                                  |
| Chloride (mmol/L)              | 95 ± 1.76                              | 95.45 ± 1.43                               | 94–101                                   |
| Leptin (pg/mL)                 | 2897.1 ± 1281                          | 3379 ± 1397.4                              | [1]                                      |
| IGF-I (ng/mL)                  | 1684.4 ± 141.5                         | 1640.4 ± 252                               | [1]                                      |

Reference values were provided by AML Ltd.

**Table S4.** Serum chemical analysis after re-feeding.

| Parameters                     | Control <i>sn-1,3</i> ,<br>Diet (CD) | Infat Oil (BPA)<br>Diet (IO) | Reference Values<br>Male Sprague-<br>Dawley Rats |
|--------------------------------|--------------------------------------|------------------------------|--------------------------------------------------|
| Creatinine (mg/dl)             | 0.23 ± 0.03                          | 0.25 ± 0.02                  | 0.27–0.65                                        |
| Urea (mg/dl)                   | 35.62 ± 3.42                         | 37.225 ± 4.62                | 29.3–59.2                                        |
| Total protein (g/dl)           | 5.6 ± 0.21                           | 5.63 ± 0.12                  | 5.92–7.46                                        |
| Cholesterol (mg/dl)            | 144.25 ± 7.56                        | 137.25 ± 10.52               | 79–137                                           |
| Globulin (g/dl)                | 1.5 ± 0.12                           | 1.54 ± 0.23                  | 1.69–3.01                                        |
| Triglycerides (mg/dl)          | 87.75 ± 15.94                        | 72.12 ± 16.35                | 21–86                                            |
| Albumin (g/dl)                 | 4.1 ± 0.17                           | 4.08 ± 0.15                  | 3.93–4.73                                        |
| SGOT (IU/L)                    | 96.25 ± 18.74                        | 98.25 ± 32.24                | 57–210                                           |
| SGPT (IU/L)                    | 39.62 ± 4.22                         | 38.37 ± 6.44                 | 30–106                                           |
| Alkaline phosphatase<br>(IU/L) | 279.37 ± 41.61                       | 272.25 ± 34.46               | 81–197                                           |
| Calcium (mg/dl)                | 13.64 ± 0.72                         | 13.41 ± 2.12                 | 9.92–12.28                                       |
| Phosphorus (mg/dl)             | 9.08 ± 0.51*                         | 10.4 ± 1.44                  | 8.1–12.1                                         |
| Na (mmol/L)                    | 144.37 ± 2.99                        | 146 ± 2.42                   | 142–147                                          |
| K (mmol/L)                     | 7.75 ± 0.47                          | 7.55 ± 0.38                  | 5.3–7.3                                          |
| Chloride (mmol/L)              | 98.75 ± 1.77                         | 99.5 ± 1.52                  | 94–101                                           |
| IGF-I (ng/mL)                  | 868.1 ± 193.7                        | 894.2 ± 108.1                | [1]                                              |
| Leptin (pg/mL)                 | 1461 ± 196                           | 1448 ± 434.8                 | [1]                                              |

\*  $p < 0.05$  vs. IO.**Table S5.** Top 20 metabolic genes that were affected in the liver by the position of palmitic acid in the diet.

| Gene<br>Symbol | Gene Name                                                      | Gene ID      | Fold Change<br>(IO/CD) |
|----------------|----------------------------------------------------------------|--------------|------------------------|
| Nampt          | Nicotinamide phosphoribosyl transferase                        | AY 831728    | 1.86                   |
| Alas1          | 5'-Aminolevulinate Synthase 1                                  | NM 024484    | 1.76                   |
| Mllt3          | Myeloid/Lymphoid or Mixed-Lineage Leukemia; Translocated To, 3 | BC 129089    | 1.74                   |
| Ltb            | Lymphotoxin beta                                               | NM 212507    | 1.51                   |
| Eif2ak2        | Eukaryotic Translation Initiation Factor 2 Alpha Kinase 2      | NM 019335    | 1.51                   |
| Hsd17b2        | Hydroxysteroid (17-Beta) Dehydrogenase 2                       | NM 024391    | 1.5                    |
| Plek           | Pleckstrin                                                     | NM 001025750 | 1.48                   |
| Qtrtd1         | Queuine TRNA-Ribosyltransferase Accessory Subunit 2            | XM 001067760 | 1.48                   |
| Prcp           | Prolylcarboxypeptidase                                         | NM 001106281 | 1.47                   |
| Hmgcr          | 3-Hydroxy-3-Methylglutaryl-CoA Reductase                       | NM 013134    | 1.45                   |
| Atp2b2         | ATPase Plasma Membrane Ca <sup>2+</sup> Transporting 2         | NM 012508    | -1.53                  |
| Fbln5          | Fibulin 5                                                      | NM 019153    | -1.58                  |
| Fign           | Fidgetin                                                       | NM 001106484 | -1.58                  |
| Sgk2           | SGK2, Serine/Threonine Kinase 2                                | NM 134463    | -1.61                  |
| Dpep1          | Dipeptidase 1                                                  | NM 053591    | -1.68                  |
| Lpl            | Lipoprotein Lipase                                             | NM 012598    | -1.7                   |
| Efnal          | Ephrin A1                                                      | NM 053599    | -1.74                  |
| Lox            | Lysyl Oxidase                                                  | NM 017061    | -1.85                  |
| Rnf125         | Ring Finger Protein 125, E3 Ubiquitin Protein Ligase           | NM 001108424 | -2.24                  |
| Egr1           | Early Growth Response 1                                        | NM 012551    | -3.38                  |

Metabolism was assigned according to the David website (<https://david.ncicrf.gov/>).

## References

1. Masarwi, M.; Gabet, Y.; Dolkart, O.; Brosh, T.; Shamir, R.; Phillip, M.; Gat-Yablonski, G. Skeletal effect of casein and whey protein intake during catch-up growth in young male Sprague-Dawley rats. *Br. J. Nutr.* **2016**, *116*, 59–69.
